# Supplementary material for: Facile synthesis of high quality mesoporous SBA-15 with enhanced control of the porous network connectivity and wall thickness
Source: Royal Society of Chemistry journal article supplement (doi:10.1039/b303696k), 2003-01-01
Supplement: b303696k-1.doc [file b303696k-1.doc]

Table 1 Structural properties of the SBA-15 samples

| Samples  SiO2/P123  ( r ) | Unit cell *a*  as-syn. calcined  (nm) | Pore size *w* a  BJHads./BJHdes.  (nm) | Wall thicknessb  (nm) | Pore volume a  (cm3/g) | BET surface area a  (m2/g) |
| --- | --- | --- | --- | --- | --- |
|  |  |  |  |  |  |
| 45 | 12.29 9.99 | 8.6 / 6.6 | 1.39 | 1.17 | 701 |
| 60 | 12.57 10.29 | 7.4 / 6.0 | 2.89 | 0.86 | 611 |
| 75 | 11.85 10.62 | 6.9 / 5.4 | 3.72 | 0.72 | 527 |

*a* We do not intend here to discuss the accuracy of the evaluation methods used. In any cases, they can be employed systematically to identify trends. However, the BJH is known to underestimate pore sizes by about 20-25% (ref. 8) b Calculated from *a*- *w*BJH adsorption
